# Supplementary material
Source: PubMed Central journal article supplement (PMC4159202)
Supplement: bi500420y_si_001.pdf [file bi500420y_si_001.pdf]

## Supporting Information

### Structural analysis of diheme cytochrome *c* by hydrogen deuterium exchange mass spectrometry and homology modeling

Ying Zhang<sup>1</sup>, Erica L-W. Majumder<sup>1</sup>, Hai Yue<sup>1</sup>, Robert E. Blankenship<sup>1,2\*</sup> and Michael L. Gross<sup>1\*</sup>

#### HDX kinetic curves

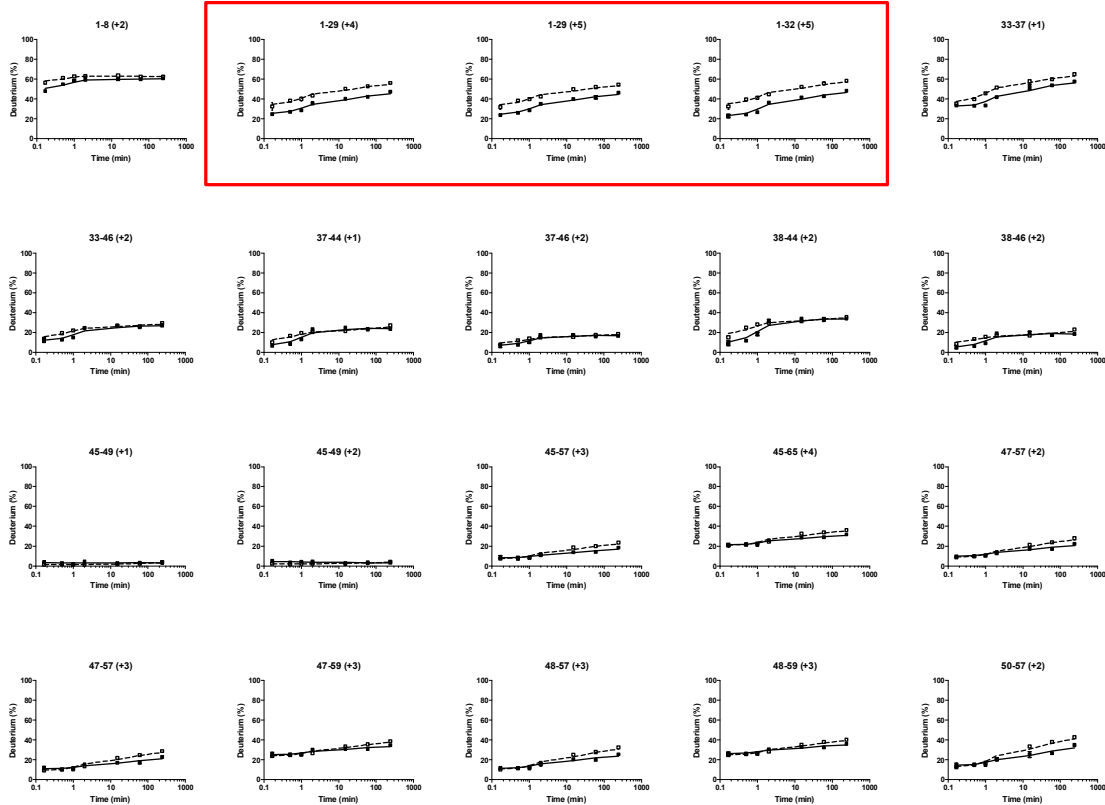

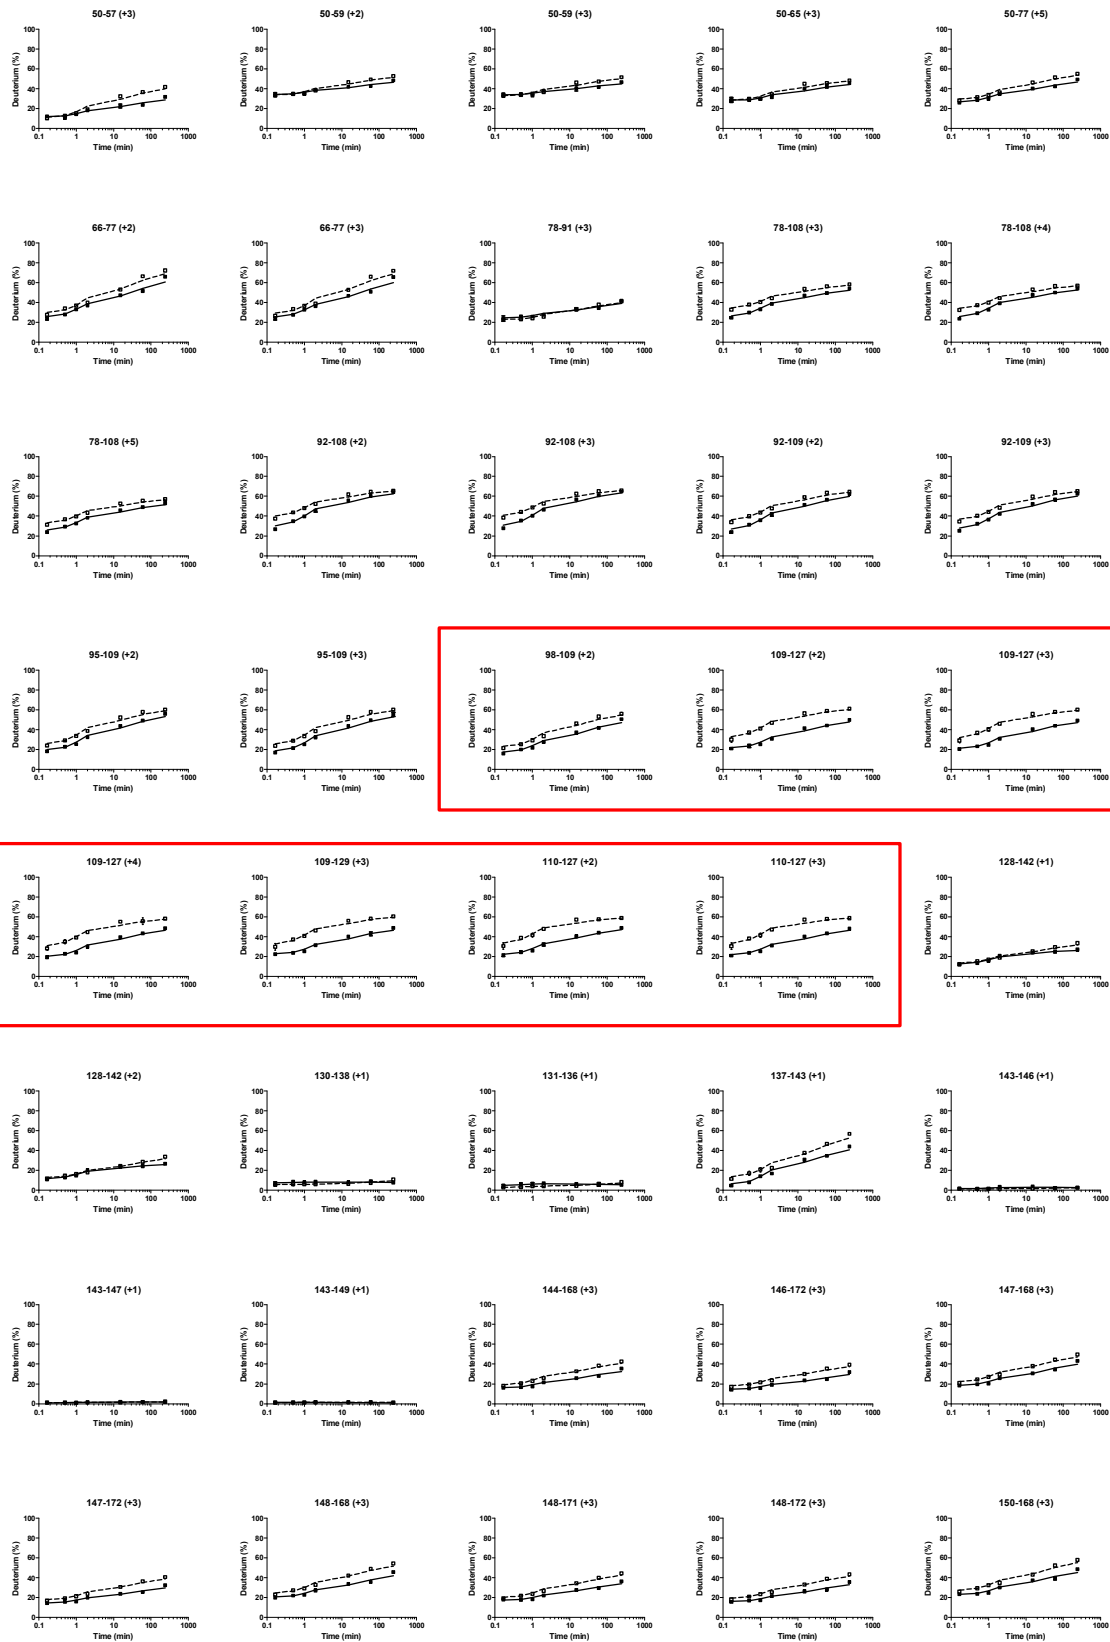

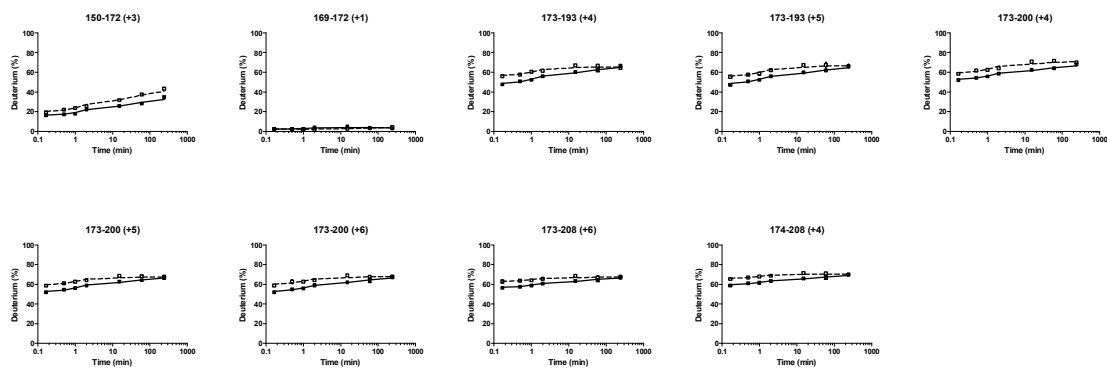

Figure S1. Kinetic curves of all the peptides used for HDX mapping for reduced (solid line) and oxidized (dash line) states of the DHCC. The peptides involved in heme *c* binding pockets are highlighted in red frames. Numbers in parentheses with “+” sign are the charge states of the peptides.

## 109-127 (+2)

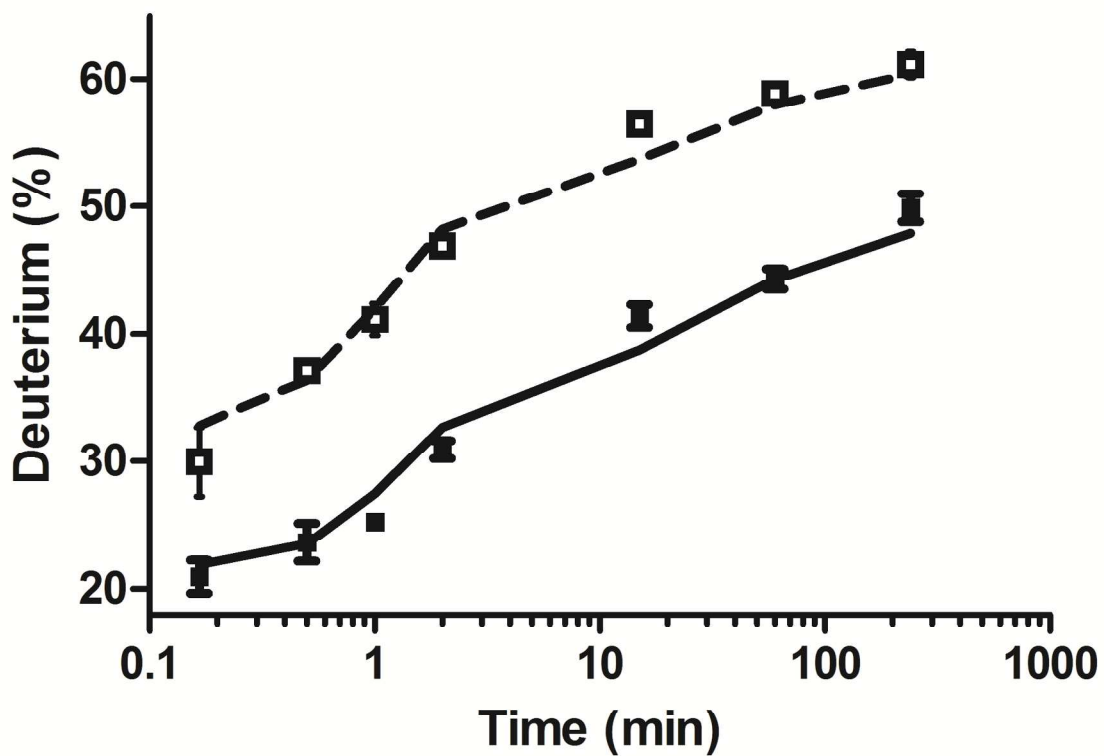

Figure S2. Selected HDX kinetic curves for demonstration of the precision for each experiment. The curves are typical through the sequence.

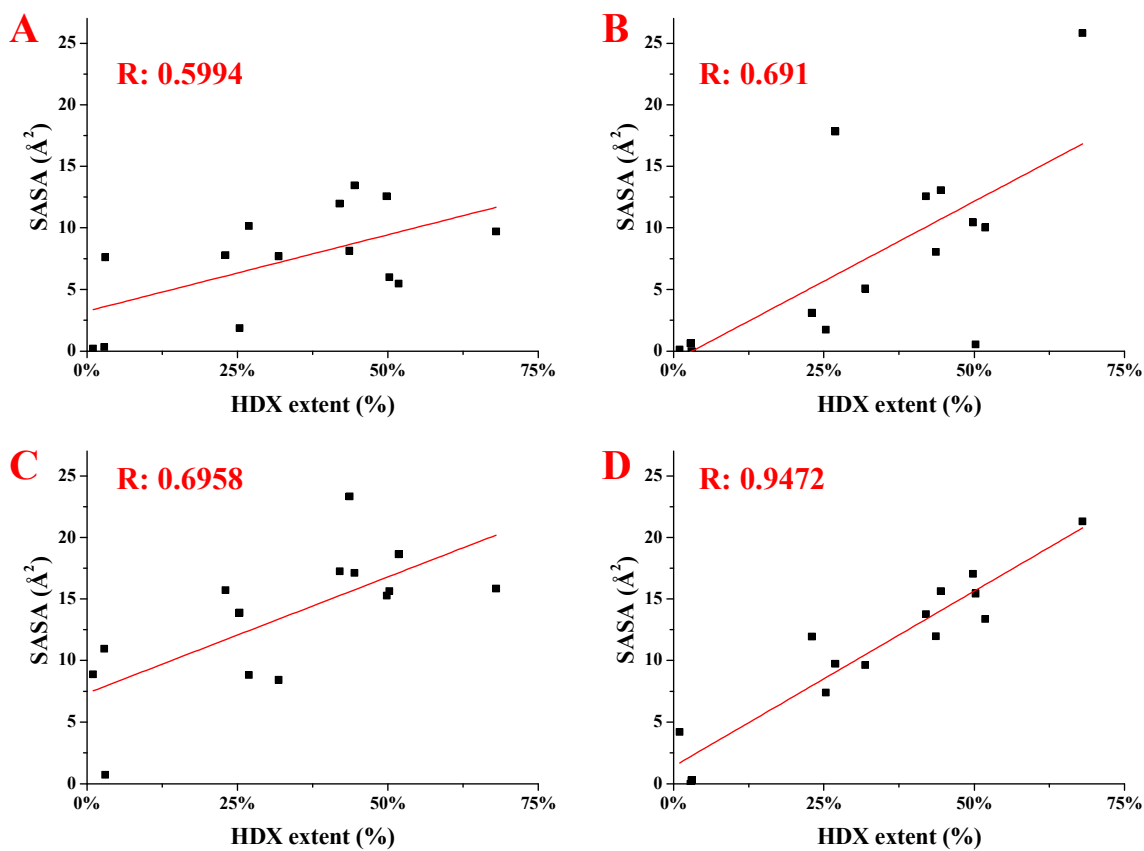

Figure S3. Correlation of HDX and SASA data for all models A (A), B (B), C (C) and D (D). The Pearson correlation coefficients R's are shown in red.
